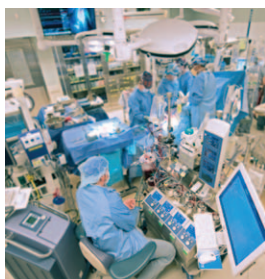

## ON THE COVER:

Acute kidney injury is a common complication after cardiac surgery with cardiopulmonary bypass (CPB). In this issue of *ANESTHESIOLOGY*, Lannemyr *et al.* evaluated the effects of CPB on renal oxygenation in patients undergoing cardiac surgery. They conclude that cardiopulmonary bypass impairs renal oxygenation due to renal vasoconstriction and hemodilution during and after CPB. In an accompanying Editorial View, Billings *et al.* explains the implications of these findings in the context of the complexities of oxygenation of the kidney.

- Lannemyr *et al.*: Effects of Cardiopulmonary Bypass on Renal Perfusion, Filtration, and Oxygenation in Patients Undergoing Cardiac Surgery, p. 205
- Billings *et al.*: Renal Oxygen Flux during Cardiopulmonary Bypass; Tubular Damage to Preserve Glomerular Filtration—What's a Kidney to Do? p. 199

## ◆ THIS MONTH IN ANESTHESIOLOGY

## ■ SCIENCE, MEDICINE, AND THE ANESTHESIOLOGIST

17A

## ■ INFOGRAPHICS IN ANESTHESIOLOGY

20A

## ◆ EDITORIAL VIEWS

### Renal Oxygen Flux during Cardiopulmonary Bypass; Tubular Damage to Preserve Glomerular Filtration—What's a Kidney to Do?

*F. T. Billings IV, Y. Jiang, and A. D. Shaw*

199

### Isolated Forearm Test: Replicated, Relevant, and Unexplained

*K. O. Pryor and R. A. Veselis*

202

## ■ PERIOPERATIVE MEDICINE

## CLINICAL SCIENCE

### ◆◆ Effects of Cardiopulmonary Bypass on Renal Perfusion, Filtration, and Oxygenation in Patients Undergoing Cardiac Surgery

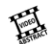

*L. Lannemyr, G. Bragadottir, V. Krumbholz, B. Redfors, J. Sellgren, and S.-E. Ricksten*

205

Cardiopulmonary bypass impairs renal oxygenation due to renal vasoconstriction and hemodilution during and after cardiopulmonary bypass, accompanied by an increase in N-acetyl-β-D-glucosaminidase.

◆ Refers to This Month in Anesthesiology

◆ Refers to Editorial Views

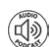

This article has an Audio Podcast

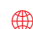

See Supplemental Digital Content

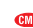

CME Article

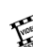

This article has a Video Abstract

- ◆◆ **Incidence of Connected Consciousness after Tracheal Intubation: A Prospective, International, Multicenter Cohort Study of the Isolated Forearm Technique** 214  
*R. D. Sanders, A. Gaskell, A. Raz, J. Winders, A. Stevanovic, R. Rossaint, C. Boncyk, A. Defresne, G. Tran, S. Tasbihgou, S. Meier, P. E. Vlisides, H. Fardous, A. Hess, R. M. Bauer, A. Absalom, G. A. Mashour, V. Bonhomme, M. Coburn, and J. Sleigh*  
 In a prospective, multicenter study of the incidence of connected consciousness in response to tracheal intubation in 260 anesthetized surgical patients, 4.6% had connected consciousness detected by the isolated forearm technique, none of whom had explicit recall. Connected consciousness was more common in younger patients and those less deeply anesthetized as detected by depth of anesthesia monitors.
- ◆ **Impact of Methylprednisolone on Postoperative Quality of Recovery and Delirium in the Steroids in Cardiac Surgery Trial: A Randomized, Double-blind, Placebo-controlled Substudy** 223  
*C. F. Royse, L. Saager, R. Whitlock, J. Ou-Young, A. Royse, J. Vincent, P. J. Devereaux, A. Kurz, A. Awais, K. Panjasawatwong, and D. I. Sessler*  
 High-dose intraoperative methylprednisolone neither reduces delirium nor improves the quality of recovery in high-risk cardiac surgical patients.
- ◆ **Safety of Perioperative Glucocorticoids in Elective Noncardiac Surgery: A Systematic Review and Meta-analysis** 234  
*A. J. Toner, V. Ganeshanathan, M. T. Chan, K. M. Ho, and T. B. Corcoran*  
 Glucocorticoids did not impact on any wound infection (odds ratio, 0.84; 95% CI, 0.62 to 1.15) or length of stay (weighted mean difference, -0.27 days; CI, -1.37 to 0.84). Glucocorticoids slightly increased peak postoperative glucose concentrations by 20 mg/dl (CI, 11 to 29;  $P < 0.001$ ), an amount that is probably not clinically important. Single-dose steroid administration for prevention of nausea appears safe.
- ◆ **Arterial Pressure Variation in Elective Noncardiac Surgery: Identifying Reference Distributions and Modifying Factors** 249  
*M. R. Mathis, S. A. Schechtman, M. C. Engoren, A. M. Shanks, A. Thompson, S. Kheterpal, and K. K. Tremper*  
 Systolic pressure variation (SPV) and pulse pressure variation reference distributions were established. Nonsupine positioning and preoperative  $\beta$  blocker were independently associated with altered SPV and pulse pressure variation, whereas ventilator tidal volume more than 8 ml/kg ideal body weight and peak inspiratory pressure more than 16 cm H<sub>2</sub>O demonstrated independent associations for SPV only.
- ◆ **Changes in Stroke Volume Induced by Lung Recruitment Maneuver Predict Fluid Responsiveness in Mechanically Ventilated Patients in the Operating Room** 260  
*M. Biais, R. Lanchon, M. Sesay, L. Le Gall, B. Pereira, E. Futier, and K. Nouette-Gaulain*  
 This study suggests that the magnitude of stroke volume decrease during lung recruitment maneuver may predict preload responsiveness in mechanically ventilated patients in the operating room.
- ◆ **Intravenous Amisulpride for the Prevention of Postoperative Nausea and Vomiting: Two Concurrent, Randomized, Double-blind, Placebo-controlled Trials** 268  
*T. J. Gan, P. Kranke, H. S. Minkowitz, S. D. Bergese, J. Motsch, L. Eberhart, D. G. Leiman, T. I. Melson, D. Chassard, A. L. Kovac, K. A. Candiotti, G. Fox, and P. Diemunsch*  
 In two essentially identical, randomized, double-blind, placebo-controlled, parallel-group phase III studies performed in adult inpatients undergoing elective surgery under general anesthesia and having at least two of the four Apfel risk factors for postoperative nausea and vomiting (PONV), a single 5-mg dose of amisulpride was safe and superior to placebo in reducing the incidence of PONV.
- ◆ **Perioperative Outcomes and Management in Pediatric Complex Cranial Vault Reconstruction: A Multicenter Study from the Pediatric Craniofacial Collaborative Group** 276  
*P. A. Stricker, S. M. Goobie, F. P. Cladis, C. M. Haberkern, P. M. Meier, S. K. Reddy, T. T. Nguyen, L. Cai, M. Polansky, P. Szmuk, and the Pediatric Craniofacial Collaborative Group*  
 The majority of patients received blood transfusion and were admitted to the intensive care unit postsurgery. Notable complications included cardiac arrest, hypotension, seizures, coagulopathy, and large-volume blood transfusion. There were significant variations in perioperative management practices and in-hospital outcomes. These results serve as a platform for future comparisons of management practice.

## BASIC SCIENCE

- ◆ **Sevoflurane Exposure during the Critical Period Affects Synaptic Transmission and Mitochondrial Respiration but Not Long-term Behavior in Mice** 288  
*W. Chung, M. J. Ryu, J. Y. Heo, S. Lee, S. Yoon, H. Park, S. Park, Y. Kim, Y. H. Kim, S. H. Yoon, Y. S. Shin, W. H. Lee, X. Ju, G. R. Kweon, and Y. Ko*

Sevoflurane transiently increased excitatory transmission at 6 h post exposure in male but not in female mice. By contrast, inhibitory transmission was decreased in male mice but increased in female mice at 6 h post exposure. No changes in behavioral function were observed. The results suggest that the transient changes induced by sevoflurane in excitatory and inhibitory transmission do not impact long-term cognitive function.

## ■ CRITICAL CARE MEDICINE

## BASIC SCIENCE

- Transient Receptor Potential Vanilloid 4 and Serum Glucocorticoid-regulated Kinase 1 Are Critical Mediators of Lung Injury in Overventilated Mice *In Vivo*** 300  
*L. Michalick, L. Erfinanda, U. Weichert, M. van der Giet, W. Liedtke, and W. M. Kuebler*

By using animal genetic models and pharmacologic approaches, the authors found attenuated ventilator-induced lung injury (VILI) by inhibition of transient receptor potential vanilloid (TRPV) 4 and involvement of serum glucocorticoid-regulated kinase (SGK) 1 in the TRPV4  $\text{Ca}^{2+}$ -mediated VILI through molecular interaction and phosphorylation of TRPV4 at serine 824. The results of this study suggest TRPV4 and SGK1 as potential targets for the treatment of VILI.

## ■ PAIN MEDICINE

## CLINICAL SCIENCE

- ◆ **Peripheral Nerve Blockade for Primary Total Knee Arthroplasty: A Population-based Cohort Study of Outcomes and Resource Utilization** 312  
*D. I. McIsaac, C. J. L. McCartney, and C. van Walraven*

The length of stay was reduced in the nerve block group (relative risk [RR], 0.98; 95% CI, 0.97 to 0.99;  $P < 0.001$ ). Nerve blocks were associated with a significant decrease in readmissions (RR, 0.87; 95% CI, 0.79 to 0.88;  $P < 0.001$ ) but not emergency department visits (RR, 1.02; 95% CI, 0.98 to 1.05) or falls (RR, 1.37; 95% CI, 0.90 to 2.08). Peripheral nerve blocks very slightly reduced the hospital length of stay and reduced readmissions.

## ■ CLASSIC PAPERS REVISITED

- ◆ **Snakes and Hypertension** 321  
*E. D. Miller, Jr.*

## ■ EDUCATION

## IMAGES IN ANESTHESIOLOGY

- Laryngeal Cleft** 325  
*R. J. Eapen, B. M. Taicher, E. Benner, and K. Machovec*
- Double Aortic Arch Causing Severe Tracheal Compression** 326  
*D. W. Barbara, S. M. Broski, R. K. Patch, and A. Pochettino*

## ORIGINAL INVESTIGATIONS IN EDUCATION

- A Feedback and Evaluation System That Provokes Minimal Retaliation by Trainees** 327  
*K. Baker, B. Haydar, and S. Mankad*

In a residency training program, faculty members who assigned lower clinical performance scores to residents did not receive lower clinical teaching scores. In this institution's residency program, there was little or no retaliatory effect when faculty members gave residents low clinical scores when providing confidential evaluations and written feedback to trainees.

## CLINICAL CONCEPTS AND COMMENTARY

- ◇ **Value of Preoperative Hemostasis Testing in Patients with Liver Disease for Perioperative Hemostatic Management** 338  
*T. Lisman and R. J. Porte*

Preoperative hemostasis testing may have limited use in patients with liver disease, and an abnormal platelet count, prothrombin time, activated partial thromboplastin time, and fibrinogen level should not trigger prophylactic transfusion of blood product components.

## MIND TO MIND

- On Scene** 345  
*J. M. Berry*
- Code Gray** 346  
*R. K. Jansen*

## ■ CORRESPONDENCE

- Cutaneous Mitochondrial  $PO_2$ : A Beginning of a New Era?** 348  
*M. Mikhael, N. Nasr, and P. Al Jindi*

**In Reply**  
*L. H. L. Römers, T. Johannes, R. J. Stolker, and E. G. Mik*

- Flumazenil Modulation of the  $\gamma$ -Aminobutyric Acid Type A Receptor: Competitive versus Noncompetitive Antagonism at the Agonist-binding Site** 350  
*D. E. Raines*

- A Rising Tide Lifts All Boats: Increased Ventilation May Be Involved in Accelerated Recovery from Isoflurane Anesthesia after Flumazenil Administration** 351  
*A. B. Petrenko and H. Baba*

**In Reply**  
*S. A. Safavynia, G. Keating, I. Speigel, J. A. Fidler, M. Kreuzer, D. B. Rye, A. Jenkins, and P. S. García*

- Nobel Prize for Anesthesia Pioneer** 354  
*T. J. Olds and G. R. Kracke*

**In Reply**  
*N. Hansson, H. Fangerau, A. Tufts, and I. J. Polianski*

- As the Pendulum Swings from the Needle to the Scalpel, the Evolution of Emergency Airway Management Will Continue** 355  
*H. P. Grocott*

**In Reply**  
*T. Asai*

## ■ REVIEWS OF EDUCATIONAL MATERIAL

357

## CONTENTS

### ■ ERRATUM

- Sedation with Dexmedetomidine or Propofol Impairs Hypoxic Control of Breathing in Healthy Male Volunteers: A Nonblinded, Randomized Crossover Study: Erratum** 360
- “Protective Ventilation” During Anesthesia: Is It Meaningful? Erratum** 360
- All Valve Functions Are Not the Same: Erratum** 360

### ■ ANNOUNCEMENTS

361

### ■ CAREERS & EVENTS

21A

## INSTRUCTIONS FOR AUTHORS

The most recently updated version of the Instructions for Authors is available at [www.anesthesiology.org](http://www.anesthesiology.org). Please refer to the Instructions for the preparation of any material for submission to ANESTHESIOLOGY.

Manuscripts submitted for consideration for publication must be submitted in electronic format. The preferred method is via the Journal's Web site (<http://www.anesthesiology.org>). Detailed directions for submissions and the most recent version of the Instructions for Authors can be found on the Web site (<http://www.anesthesiology.org>). Books and educational materials should be sent to Alan Jay Schwartz M.D., M.S.Ed., Director of Education, Department of Anesthesiology and Critical Care Medicine, The Children's Hospital of Philadelphia, 34th Street and Civic Center Blvd., Room 9327, Philadelphia, Pennsylvania 19104-4399. Requests for permission to duplicate materials published in ANESTHESIOLOGY should be submitted in electronic format, to the Permissions Department ([journalpermissions@lww.com](mailto:journalpermissions@lww.com)). Advertising and related correspondence should be addressed to Advertising Manager, ANESTHESIOLOGY, Wolters Kluwer Health, Inc., Two Commerce Square, 2001 Market Street, Philadelphia, Pennsylvania 19103 (Web site: <http://www.wkadcenter.com/>). Publication of an advertisement in ANESTHESIOLOGY does not constitute endorsement by the Society or Wolters Kluwer Health, Inc. of the product or service described therein or of any representations made by the advertiser with respect to the product or service.

ANESTHESIOLOGY (ISSN 0003-3022) is published monthly by Wolters Kluwer Health, Inc., 14700 Citicorp Drive, Bldg 3, Hagerstown, MD 21742. Business office: Two Commerce Square, 2001 Market Street, Philadelphia, PA 19103. Periodicals postage paid at Hagerstown, MD, and at additional mailing offices. Copyright © 2017, the American Society of Anesthesiologists, Inc.

**Annual Subscription Rates:** *United States*—\$981 Individual, \$1876 Institution, \$354 In-training. *Rest of World*—\$930 Individual, \$2084 Institution, \$354 In-training. Single copy rate \$189. Subscriptions outside of North America must add \$54 for airfreight delivery. Add state sales tax, where applicable. The GST tax of 7% must be added to all orders shipped to Canada (Wolters Kluwer Health, Inc.'s GST Identification #895524239, Publications Mail Agreement #1119672). Indicate in-training status and name of institution. Institution rates apply to libraries, hospitals, corporations, and partnerships of three or more individuals. Subscription prices outside the United States must be prepaid. Prices subject to change without notice. Subscriptions will begin with currently available issue unless otherwise requested. Visit us online at [www.lww.com](http://www.lww.com).

Individual and in-training subscription rates include print and access to the online version. Online-only subscriptions for individuals (\$301) and persons in training (\$301) are available to nonmembers and may be ordered by downloading a copy of the Online Subscription FAXback Form from the Web site, completing the information requested, and faxing the completed form to 301-223-2400/44 (0) 20 7981 0535. Institutional rates are for print only; online subscriptions are available via Ovid. Institutions can choose to purchase a print and online subscription together for a discounted rate. Institutions that wish to purchase a print subscription, please contact Wolters Kluwer Health, Inc., 14700 Citicorp Drive, Bldg 3, Hagerstown, MD 21742; phone: 1-800-638-3030 (outside the United States 301-223-2300/44 (0) 20 7981 0525); fax: 301-223-2400/44 (0) 20 7981 0535. Institutions that wish to purchase an online subscription or online with print, please contact the Ovid Regional Sales Office near you or visit [www.ovid.com/site/index.jsp](http://www.ovid.com/site/index.jsp) and select Contact and Locations.

**Address for non-member subscription information, orders, or change of address:** Wolters Kluwer Health, Inc., 14700 Citicorp Drive, Bldg 3, Hagerstown, MD 21742; phone: 1-800-638-3030 (outside the United States 301-223-2300/44 (0) 20 7981 0525); fax: 301-223-2400/44 (0) 20 7981 0535; email: [customerservice@lww.com](mailto:customerservice@lww.com). In Japan, contact LWW Japan Ltd., 3-23-14 Hongo, Bunkyo-ku, Tokyo 113, Japan; phone: 81-3-5689-5400; fax: 81-3-5689-5402; email: [bclaim@lww.co.jp](mailto:bclaim@lww.co.jp). In Bangladesh, India, Nepal, Pakistan, and Sri Lanka, contact Globe Publications Pvt. Ltd., B-13 3rd Floor, A Block, Shopping Complex, Naraina, Vihar, Ring Road, New Delhi 110028, India; phone: 91-11-25770411; fax: 91-11-25778876; email: [info@globepub.com](mailto:info@globepub.com).

**Address for member subscription information, orders, or change of address:** Members of the American Society of Anesthesiologists receive the print and online journal with their membership. To become a member or provide a change of address, please contact the American Society of Anesthesiologists, 1061 American Lane, Schaumburg, Illinois 60173-4973; phone: 847-825-5586; fax: 847-825-1692; email: [membership@ASAhq.org](mailto:membership@ASAhq.org). For all other membership inquiries, contact Wolters Kluwer Health, Inc., Customer Service Department, P.O. Box 1610, Hagerstown, MD 21740; phone: 1-800-638-3030 (outside the United States 301-223-2300/44 (0) 20 7981 0525); fax: 301-223-2400/44 (0) 20 7981 0535; email: [memberservice@lww.com](mailto:memberservice@lww.com).

**Postmaster:** Send address changes to ANESTHESIOLOGY, P.O. BOX 1610, Hagerstown, MD 21740.

**Advertising:** Please contact Ryan Magee, National Sales Manager, Product & Services Advertising, Journals and Websites, Wolters Kluwer Health, Inc., Two Commerce Square, Philadelphia, PA 19103; tel: (215) 521-8804, fax: (215) 521-8801, e-mail: [Ryan.Magee@wolterskluwer.com](mailto:Ryan.Magee@wolterskluwer.com). For classified advertising: Joe Anzuena, Recruitment Advertising Representative, Wolters Kluwer Health, Inc., Two Commerce Square, 2001 Market Street, Philadelphia, PA 19103; tel: (215) 521-8532, fax: (215) 701-2410. e-mail: [Joe.Anzuena@wolterskluwer.com](mailto:Joe.Anzuena@wolterskluwer.com).
